# Supplementary material
Source: PubMed Central journal article supplement (PMC5628572)

## Supplementary Data

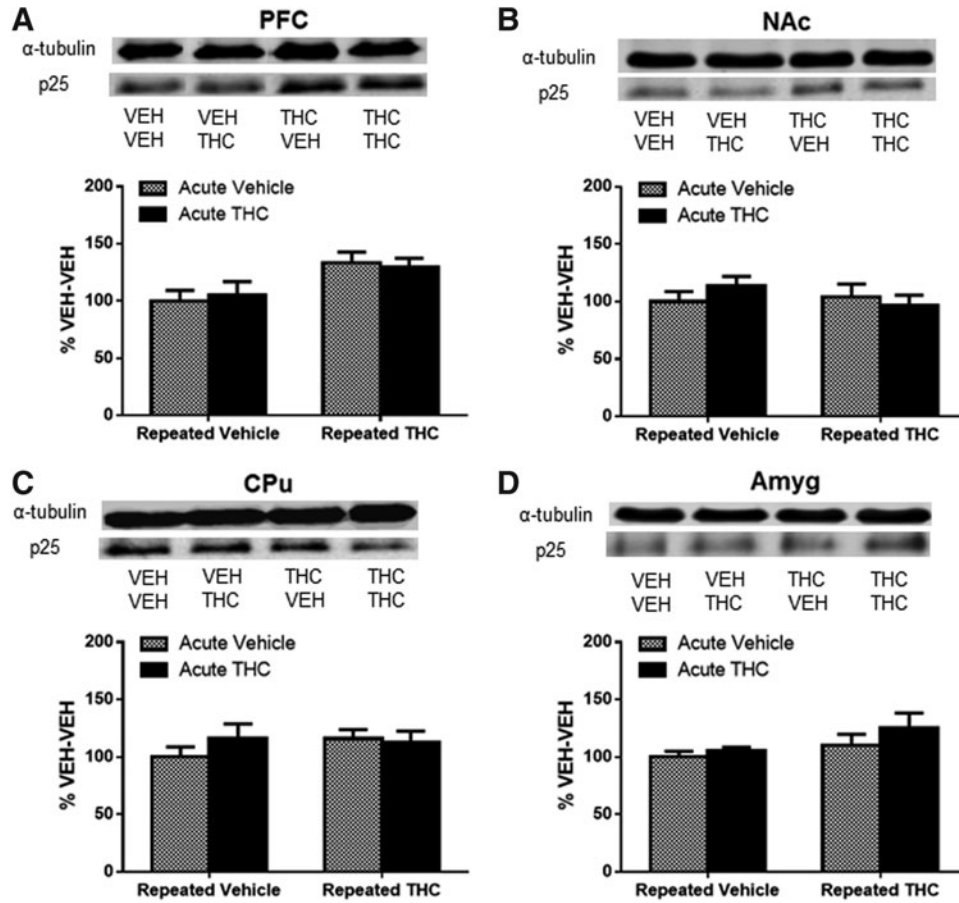

**SUPPLEMENTARY FIG. S1.** Expression of p25 does not change in any region of acute or repeated THC-treated mice. Graphs show p25 protein expression after acute vehicle or THC challenge in repeated vehicle- or THC-treated mice in (A) PFC, (B) NAc, (C) CPu, and (D) Amyg. Values are expressed as mean %VEH-VEH controls  $\pm$  SEM from  $N=5-8$  mice per treatment group. Amyg, amygdala; CPu, caudate-putamen; NAc, nucleus accumbens; PFC, prefrontal cortex; SEM, standard error of the mean; THC,  $\Delta^9$ -tetrahydrocannabinol; VEH, vehicle.

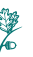

Supplement: Supp_Fig1.pdf [file Supp_Fig1.pdf]
