# Supplementary material
Source: PubMed Central journal article supplement (PMC5628572)

### Supplementary Table S1. Antibodies

| Antibody                | Company (catalog No.)                | Dilution |
|-------------------------|--------------------------------------|----------|
| $\alpha$ -Tubulin       | Abcam (ab7291)                       | 1:20000  |
| CDK5                    | Santa Cruz Biotechnology (sc-173)    | 1:2000   |
| DARPP-32                | Santa Cruz Biotechnology (sc-135871) | 1:2000   |
| ERK1                    | Cell Signaling Technology (4696S)    | 1:2000   |
| FosB                    | Santa Cruz Biotechnology (sc-7203)   | 1:500    |
| p35/p25                 | Cell Signaling Technology (2680S)    | 1:1000   |
| Phospho-T75<br>DARPP-32 | Cell Signaling Technology (2301S)    | 1:1000   |
| Phospho-ERK1            | Cell Signaling Technology (4379S)    | 1:2000   |
| Phospho-GSK3 $\beta$    | Cell Signaling Technology (9336S)    | 1:1000   |
| Phospho-Tau             | Thermo Scientific (MN1020)           | 1:500    |
| Tau                     | Proteintech (10274-1-AP)             | 1:500    |

CDK5, cyclin-dependent kinase 5; DARPP-32, dopamine- and cAMP-regulated phosphoprotein of 32 kDa; ERK, extracellular signal-regulated kinase; GSK3 $\beta$ , glycogen synthase kinase-3 $\beta$ ; T75, threonine 75.

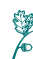

Supplement: Supp_Table1.pdf [file Supp_Table1.pdf]
